# Supplementary material
Source: publisher figshare collection journal article supplement (https://sage.figshare.com/ndownloader/files/23797819)
Supplement: Supplementary file 1 [file 23797819]

## Supplemental Materials and methods

### *Quantitative Polymerase Chain Reaction (qPCR)*

We carried out qPCR to estimate the copy number of the 16S ribosomal RNA gene and colony forming unit (CFU) for *Staphylococcus aureus* and *Staphylococcus epidermidis* in the extracted DNA sample. For qPCR, THUNDERBIRD SYBR qPCR Mix (Toyobo Co., Ltd., Osaka, Japan) was used with LightCycler 480 System (F. Hoffmann-La Roche, Ltd.). The primer sequences were as follows: 321Fmod (5'-ACT GAG AYA CGG YCC A-3') and 524R (5'-CTG CTG GCA CGD AGT TAG CC-3') for 16S rRNA gene (Ogai et al., 2018); nucF (5'-GCG ATT GAT GGT GAT ACG GTT-3') and nucR (5'-AGC CAA GCC TTG ACG AAC TAA AGC-3') for *S. aureus* (Brakstad, Aasbakk, & Maeland, 1992); SepF (5'- CAG TTA ATC GGT ATG AGA GC -3') and SepR (5'-CTG TAG AGT GAC AGT TTG GT-3') for *S. epidermidis* (Iorio et al., 2011). A solution with known concentration ( $10^7$  CFU) of each bacterial suspension (*S. aureus* ATCC 6538P or *S. epidermidis* ATCC 14990) was processed for DNA extraction, and the extracted DNA solution was then serially diluted by 1:10 down to  $10^0$  CFU (eight series in total) and used as standards.

## References

- Brakstad, O. G., Aasbakk, K., & Maeland, J. A. (1992). Detection of *Staphylococcus aureus* by polymerase chain reaction amplification of the *nuc* gene. *J Clin Microbiol*, 30(7), 1654-1660.
- Iorio, N. L., Azevedo, M. B., Frazao, V. H., Barcellos, A. G., Barros, E. M., Pereira, E. M., et al. (2011). Methicillin-resistant *Staphylococcus epidermidis* carrying biofilm formation genes: detection of clinical isolates by multiplex PCR. *Int Microbiol*, 14(1), 13-17.
- Ogai, K., Nagase, S., Mukai, K., Iuchi, T., Mori, Y., Matsue, M., et al. (2018). A comparison of techniques for collecting skin microbiome samples: swabbing versus tape-stripping. *Front Microbiol*, 9, 2362.

## Supplemental Figures

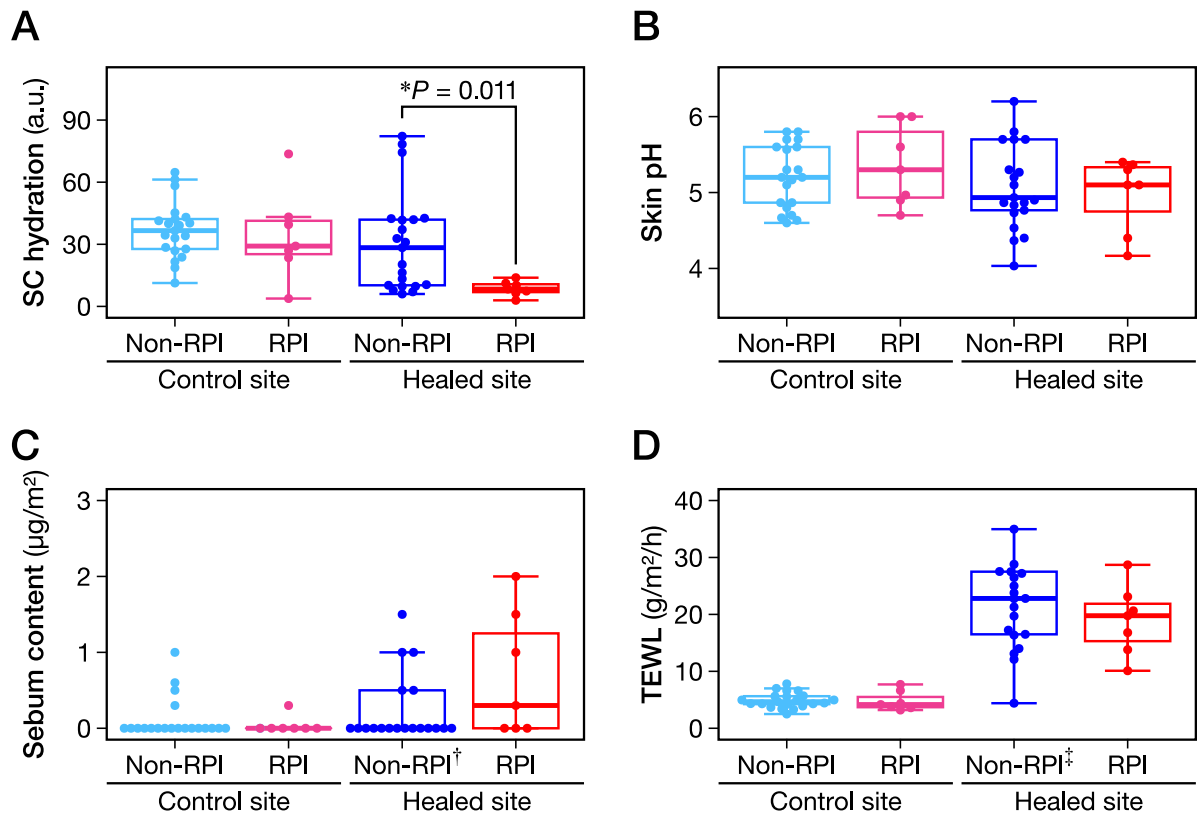

**Supplemental Figure 1.** Characteristics of skin physiology.

Stratum corneum (SC) hydration (A), pH (B), sebum content (C), and transepidermal water loss (TEWL) (C) are presented as box plots, grouped by sites and recurrence.

\* $P < 0.05$  in Mann–Whitney  $U$  test.

<sup>†</sup>Two data points (24.0 and 30.1) are not displayed.

<sup>‡</sup>Two data points (62.4 and 116) are not displayed.

RPI, recurrent pressure injury.

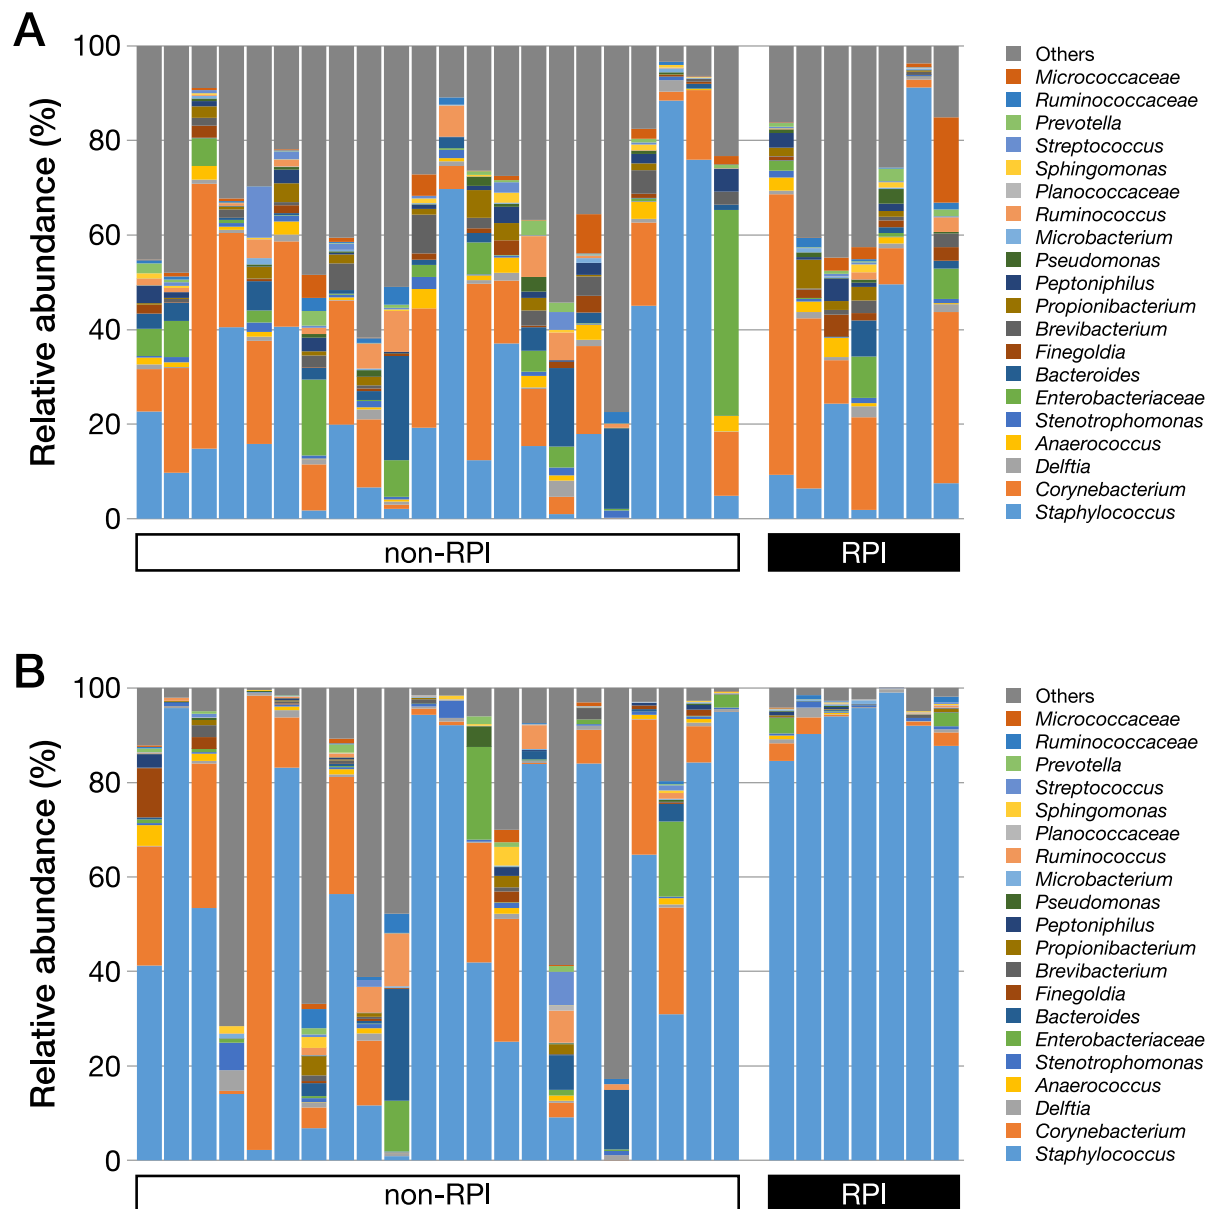

**Supplemental Figure 2.** Compositions of the top 20 skin bacteria on the control site (A) and on the healed site (B). RPI, recurrent pressure injury.

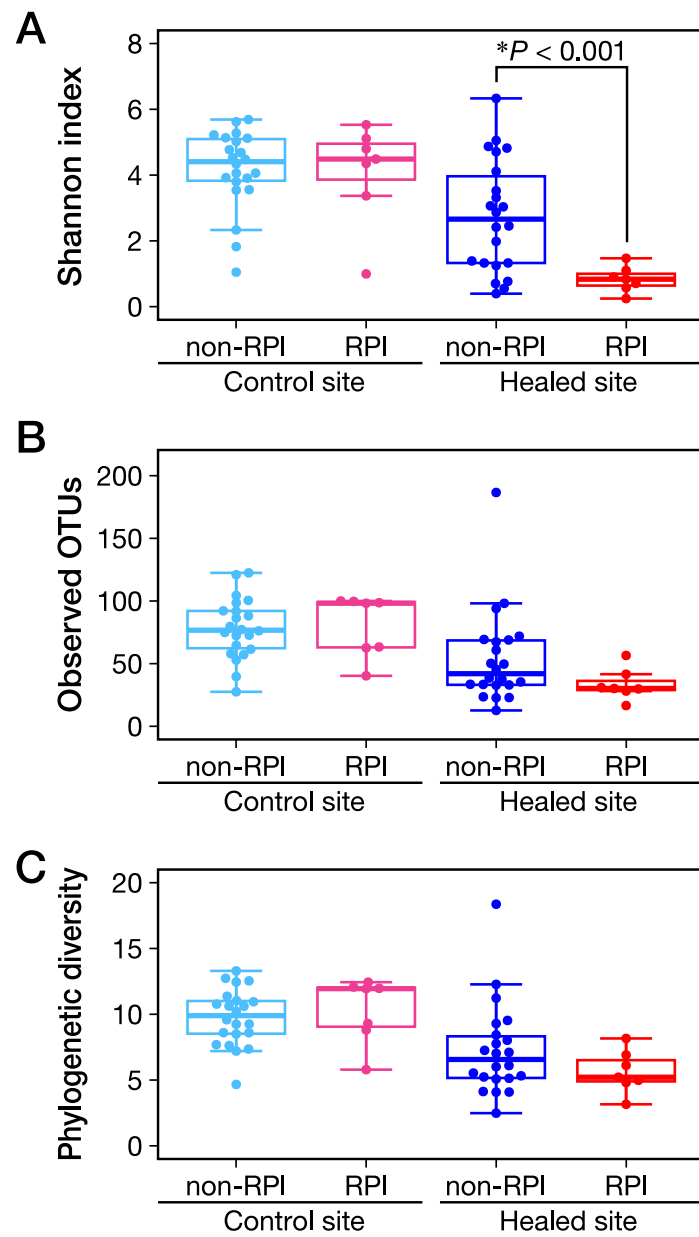

**Supplemental Figure 3.** Alpha diversity.

The Shannon index (A), the number of observed OTUs (B), and phylogenetic diversity (C) are shown.

\* $P < 0.001$  in Mann–Whitney  $U$  test.

RPI, recurrent pressure injury; OTU, operational taxonomic unit.

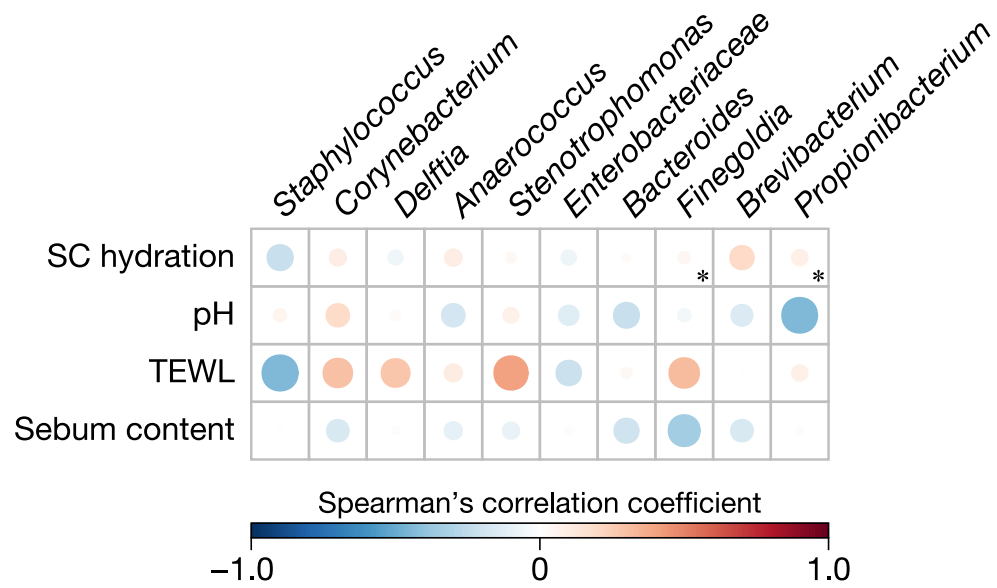

**Supplemental Figure 4.** Correlation matrix between skin physiology and microbiome. Spearman's correlation coefficient was expressed by color and the size of each circle.

\* $P < 0.05$ .

SC, stratum corneum; TEWL, transepidermal water loss.

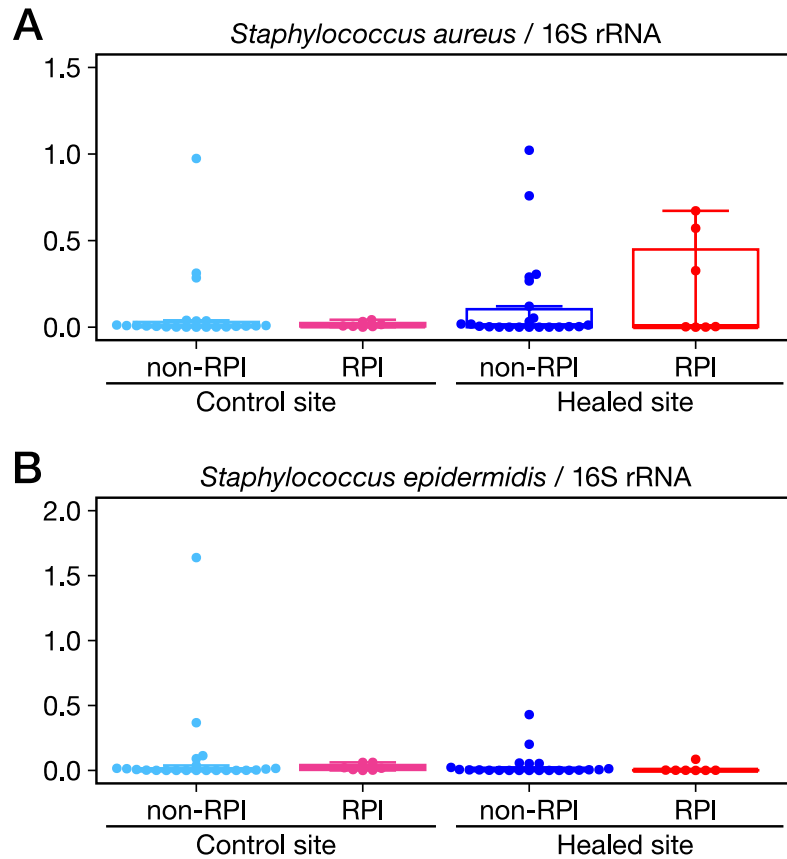

**Supplemental Figure 5.** Relative amounts of *Staphylococcus aureus* and *S. epidermidis*. Relative amounts of *Staphylococcus aureus* (A) and *S. epidermidis* (B) on the skin. Normalization was achieved by simply dividing the results of quantitative PCR for either *S. aureus* or *S. epidermidis* by the total copy number of the 16S rRNA gene. RPI, recurrent pressure injury.
